# Supplementary material
Source: publisher figshare collection journal article supplement (https://f1000.figshare.com/ndownloader/files/4858978)
Supplement: Supplementary file 1 [file 4858978]

## Sheet: Larval Coll. Method Data-SA 15
Trial	Location	Trap Type	Trap Handler (Experience Levelᵅ)	Number of mosquitoes collected		Proportions of mosquitoes collected		Estimated total time (collection+separation) / sample (minutes)
				Anopheles	Culex	prop. Anopheles	prop. Culex
1	Shingwedzi	Larval Sweep Net	LB (1)	239	19	0.709199	0.0563798	0.23876
1	Shingwedzi	VectoBac Scoop	AC (1)	66	13	0.195846	0.0385757	0.326582
2	Shingwedzi	Larval Sweep Net	AC (1)	45	2	0.918367	0.0408163	0.412766
2	Shingwedzi	VectoBac Scoop	LB (1)	2	0	0.0408163	0	5.2
3	Shingwedzi	Larval Sweep Net	LB (1)	153	1	0.95625	0.00625	0.264935
3	Shingwedzi	VectoBac Scoop	AC (1)	5	1	0.03125	0.00625	1.86667
4	Shingwedzi	Larval Sweep Net	AC (1)	2	1	0.5	0.25	3.53333
4	Shingwedzi	VectoBac Scoop	LB (1)	1	0	0.25	0	10.2
5	Shingwedzi	Larval Sweep Net	LB (1)	91	40	0.640845	0.28169	0.276336
5	Shingwedzi	VectoBac Scoop	AC (1)	3	8	0.0211268	0.056338	1.10909
6	Skukuza	Larval Sweep Net	AC (1)	2	31	0.0588235	0.911765	0.50303
6	Skukuza	VectoBac Scoop	AC (1)	0	1	0	0.0294118	10.2
7	Skukuza	Larval Sweep Net	AC (1)	4	1	0.666667	0.166667	2.2
7	Skukuza	VectoBac Scoop	AC (1)	1	0	0.166667	0	10.2
8	Skukuza	Larval Sweep Net	LB (1)	4	48	0.0714286	0.857143	0.392308
8	Skukuza	VectoBac Scoop	AC (1)	3	1	0.0535714	0.0178571	2.7
9	Skukuza	Larval Sweep Net	AC (1)	10	5	0.47619	0.238095	0.866667
9	Skukuza	VectoBac Scoop	LB (1)	0	6	0	0.285714	1.86667
10	Lapalala	Larval Sweep Net	TN (2)	15	0	0.833333	0	0.866667
10	Lapalala	VectoBac Scoop	AC (1)	2	1	0.111111	0.0555556	3.53333
11	Lapalala	Larval Sweep Net	AC (1)	5	0	0.5	0	2.2
11	Lapalala	Vectobac Scoop	TN (2)	5	0	0.5	0	2.2
12	Lapalala	Larval Sweep Net	TN (2)	10	10	0.333333	0.333333	0.7
12	Lapalala	VectoBac Scoop	AC (1)	6	4	0.2	0.133333	1.2
13	Lapalala	Larval Sweep Net	TN (2)	5	2	0.25	0.1	1.62857
13	Lapalala	VectoBac Scoop	AC (1)	1	12	0.05	0.6	0.969231
14	Lapalala	Larval Sweep Net	PM (2)	5	1	0.217391	0.0434783	1.86667
14	Lapalala	VectoBac Scoop	TJ (2)	4	13	0.173913	0.565217	0.788235
15	Lapalala	Larval Sweep Net	TJ (2)	15	15	0.483871	0.483871	0.533333
15	Lapalala	VectoBac Scoop	PM (2)	0	1	0	0.0322581	10.2
ᵅ 1 indicates experienced collector and 2 indicates novice collector
